# Supplementary material for: Transcatheter Arterial Embolization versus Open Surgery for Blunt Abdominal Solid Organ Injury with Traumatic Brain Injury: A Retrospective Cohort Study
Source: Research Square preprint supplement (doi:10.21203/rs.3.rs-7550612/v1), 2025-10-27
Supplement: Supplementary file 1 [file 57cc70cfd5e4d574bd9adc2f.docx]

**Additional file 1:** Supplementary Methods And Tables

**Table of Contents**

1. Supplementary Methods

1.1. Definition and Classification

2. Supplementary Tables

2.1. Table S1: AIS Codes Used for CT Findings of the Head

2.2. Table S2: AIS Codes Used for Blunt Abdominal Injury

2.3. Table S3: Details Regarding Complications as Secondary Outcomes

1. Supplementary Methods

1.1. Definition and Classification

1.1.1. Head Injury Classification

Traumatic brain injury (TBI) was classified based on computed tomography findings into the following categories:

**Focal TBI**: Localized injuries, including:

Epidural hematoma (EDH)

Subdural hematoma (SDH)

Subarachnoid hemorrhage (SAH)

Intraparenchymal hemorrhage (IPH)

Cerebral contusion

**Diffuse TBI**: Diffuse injuries, including:

Diffuse axonal injury (DAI)

Cerebral edema

**Mixed TBI**: Cases exhibiting both focal and diffuse injury characteristics

**Other**

Skull fracture (Bone fracture)

Other head injuries (Head Others)

Note: Bone fractures and other head injuries that could not be categorized clearly as either focal or diffuse were excluded from the TBI type classification used in subgroup analyses.

Each injury type was defined using specific Abbreviated Injury Scale (AIS) codes, as detailed in Table S1.

AIS Code Classification:

EDH: 140414.4, 140418.4, 140422.5, 140630.4, 140632.4, 140634.5, 140636.5

SDH: 140438.4, 140442.4, 140446.5, 140650.4, 140652.4, 140654.5, 140656.5

SAH: 140466.3, 140684.3

IPH: 140210.5, 140426.4, 140430.4, 140434.5, 140638.4, 140640.4, 140642.4, 140646.5, 140648.5

Contusion: 140204.5, 140402.3, 140403.3, 140404.4, 140405.5, 140602.3, 140604.3, 140606.3, 140608.4, 140610.5, 140611.3, 140612.3, 140614.3, 140616.4, 140618.5, 140620.3, 140622.3, 140624.4, 140626.5

DAI: 140628.5, 160210.4, 160814.4, 160818.5, 160824.5

Edema: 140450.3, 140660.3, 140662.3, 140664.4, 140666.5

Bone fracture: 150200.3, 150202.3, 150204.3, 150206.4, 150404.3, 150406.4, 150408.4

Head Others: 140299.5, 140202.5, 140208.5, 140499.3, 140410.4, 140474.4, 140458.3, 140462.3, 140470.3, 140699.3, 140629.4, 140688.4, 140676.3, 140678.4, 140680.3, 140682.3, 140686.3, 140799.3, 160206.3

1.1.2. Abdominal Injury Classification

Abdominal injuries were classified based on organ involvement as follows:

Liver injury

Splenic injury

Kidney injury

Vascular injuries (vessels)

Digestive tract injuries (stomach, small intestine, large intestine, rectum, anus)

Pancreatic injury

Others (Abdomen Others)

Note: The Abdomen Others category includes injuries to the skin, subcutaneous tissue, muscle, adrenal glands, bladder, gallbladder, mesentery, omentum, ovary, penis, perineum, retroperitoneal hemorrhage, ureter/urethra, uterus, and vagina/vulva.

Each injury type was defined using specific AIS codes, as detailed in Table S2.

AIS Code Classification:

Liver: 541814.3, 541824.3, 541826.4, 541828.5, 541840.4

Spleen: 544214.3, 544224.3, 544226.4, 544228.5, 544240.3

Kidney: 541614.3, 541624.3, 541626.4, 541628.5, 541640.4

Vessels: 520299.4, 520202.4, 520204.4, 520206.4, 520208.5, 520499.3, 520402.3, 520404.3, 520406.4, 520408.5, 520699.3, 520602.3, 520604.3, 520606.3, 520608.4, 521499.3, 521402.3, 521404.3, 521406.3, 521408.4, 520899.3, 520802.3, 520804.3, 520806.4, 521006.3, 521299.3, 521202.3, 521204.3, 521206.4, 521699.3, 521602.3, 521604.3, 521606.4

Digestive tract: 540424.3, 540426.4, 540824.3, 540826.4, 541023.3, 541024.4, 541028.5, 541424.3, 541426.4, 543624.3, 543625.4, 543626.5, 544424.3, 544426.4

Pancreas: 542814.3, 542824.3, 542826.4, 542828.4, 542830.4, 542832.5

Abdomen Others: 510606.3, 510806.3, 540226.3, 540622.3, 540624.4, 540626.4, 540640.3, 541224.3, 541226.4, 542024.3, 542026.4, 542224.3, 542624.3, 543026.3, 543226.3, 543800.3, 544824.3, 544826.3, 545024.3, 545026.3, 545028.4, 545230.3, 545240.3, 545426.3, 545626.3

2. Supplementary Tables

2.1. Table S1: AIS codes used for CT findings of the head

Head injuries were classified based on the 1998 version of the AIS. TBIs were categorized into nine groups: skull fracture, EDH, SDH, SAH, IPH, cerebral contusion, DAI, cerebral edema, and other injuries. Each category was defined using specific AIS codes, with injury severity indicated by the AIS score.

| AIS 98 code | Specifications |
| --- | --- |
| Internal organs | |
| 140299.5 | Brain stem (hypothalamus, medulla, midbrain, pons) NFS |
| 140202.5 | Compression (includes transtentorial [uncal] or cerebellar tonsillar herniation) |
| 140204.5 | Contusion |
| 140208.5 | Infarction |
| 140210.5 | Injury involving hemorrhage |
| 140499.3 | Cerebellum NFS |
| 140402.3 | Contusion, single or multiple NFS (includes perilesional edema for size) |
| 140403.3 | Tiny; < 1 cm diameter  Small, superficial; ≤ 15 cc, 1–3 cm diameter |
| 140404.4 | Large; 15–30 cc; > 3 cm diameter |
| 140405.5 | Extensive; massive; total volume > 30 cc |
| 140410.4 | Hematoma (hemorrhage) NFS |
| 140414.4 | Epidural or extradural NFS (includes perilesional edema for size) |
| 140418.4 | Tiny; < 0.6 cm thick  Small, moderate; ≤ 30 cc or ≤ 15 cc if ≤ age 10; 0.6–1 cm thick |
| 140422.5 | Large; massive; extensive; > 30 cc or > 15 cc if ≤ age 10; > 1 cm thick |
| 140426.4 | Intracerebellar (includes petechial and subcortical) NFS (includes perilesional edema for size) |
| 140430.4 | Tiny: < 0.6 cm diameter (includes radiographic “shearing” lesions)  Small; ≤ 15 cc; 0.6–3 cm diameter |
| 140434.5 | Large; > 15 cc; > 3 cm diameter |
| 140438.4 | Subdural NFS |
| 140442.4 | Tiny; < 0.6 cm thick  Small, moderate; ≤ 30 cc or ≤ 15 cc if ≤ age 10; 0.6–1 cm thick |
| 140446.5 | Large; massive; extensive; > 30 cc or > 15 cc if ≤ age 10; > 1 cm thick |
| 140474.4 | Laceration (not from penetrating injury) NFS |
| 140450.3 | Brain swelling/edema NFS |
| 140458.3 | Infarction (acute due to traumatic vascular occlusion) |
| 140462.3 | Ischemic brain damage directly related to head trauma |
| 140466.3 | Subarachnoid hemorrhage |
| 140470.3 | Subpial hemorrhage |
| 140699.3 | Cerebrum NFS (includes basal ganglia, thalamus, putamen, and globus pallidus) |
| 140602.3 | Contusion NFS (includes perilesional edema for size) |
| 140604.3 | Single NFS  Tiny; < 1 cm diameter |
| 140606.3 | Small; superficial; ≤ 30 cc or ≤ 15 cc if ≤ age 10; 1–4 cm diameter or 1–2 cm diameter if ≤ age 10 midline shift ≤ 5 mm |
| 140608.4 | Large; deep; 30–50 cc or 15–30 cc if ≤ age 10; > 4 cm diameter or 2–4 cm diameter if ≤ age 10 midline shift > 5 mm |
| 140610.5 | Extensive; massive; > 50 cc or > 30 cc if ≤ age 10 |
| 140611.3 | Multiple NFS |
| 140612.3 | Multiple on the same side NFS  Tiny each < 1 cm diameter |
| 140614.3 | Small; superficial; total volume ≤ 30 cc or ≤ 15 cc if ≤ age 10; midline shift ≤ 5 mm |
| 140616.4 | Large; deep; total volume 30–50 cc or 15–30 cc if ≤ age 10; midline shift > 5 mm |
| 140618.5 | Extensive; massive; > 50 cc or > 30 cc if ≤ age 10 |
| 140620.3 | Multiple; at least one on each side NFS |
| 140622.3 | Tiny; each < 1 cm diameter  Small; superficial; total volume ≤ 30 cc or ≤ 15 cc if ≤ age 10 |
| 140624.4 | Large; deep; total volume 30–50 cc or 15–30 cc if ≤ age 10 |
| 140626.5 | Extensive; massive; > 50 cc or > 30 cc if ≤ age 10 |
| 140628.5 | DAI NFS (requires coma > 6 h or, if fatal within 6 h, diagnosis confirmed pathologically)  DAI confined to the white matter or basal ganglia  DAI involving the corpus callosum |
| 140629.4 | Hematoma (hemorrhage) NFS |
| 140630.4 | Epidural or extradural NFS (includes perilesional edema for size) |
| 140632.4 | Tiny; < 0.6 cm thick  Small; moderate; ≤ 50 cc or ≤ 25 cc if ≤ age 10; 0.6–1cm thick |
| 140634.5 | Bilateral |
| 140636.5 | Large; massive; extensive; > 50 cc or > 25 cc if ≤ age 10; > 1 cm thick |
|  | Hematoma |
| 140638.4 | Intracerebral NFS (includes perilesional edema for size) |
| 140640.4 | Tiny; single or multiple <1 cm diameter |
| 140642.4 | Petechial hemorrhages (includes radiographic “shearing” lesions) |
| 140640.4 | Small; ≤ 30 cc or ≤ 15 cc if ≤ age 10; 1–4 cm diameter or ≤ 1 cm if ≤ age 10; subcortical hemorrhage |
| 140646.5 | Bilateral |
| 140648.5 | Large; > 30 cc or > 15 cc if ≤ age 10; > 4 cm or > 1 cm diameter if ≤ age 10 |
| 140650.4 | Subdural NFS |
| 140652.4 | Tiny; < 0.6 cm thick (includes tentorial [subdural] blood on one or both sides) |
| 140652.4 | Small; ≤ 30 cc or ≤ 15 cc if ≤ age 10; 1–4 cm diameter or ≤ 1 cm if ≤ age 10; subcortical hemorrhage |
| 140654.5 | Bilateral (both sides 0.6–1 cm thick) |
| 140656.5 | Large; massive; extensive; > 50 cc or > 25 cc if ≤ age 10; > 1 cm thick  Bilateral (at least one side > 1 cm thick) |
| 140688.4 | Laceration NFS |
| 140660.3 | Brain swelling NFS |
| 140662.3 | Mild; compressed ventricles without compressed brain stem cisterns |
| 140664.4 | Moderate; compressed ventricles and brain stem cisterns |
| 140666.5 | Severe; absent ventricles or brain stem cisterns |
| 140660.3 | Brain edema NFS |
| 140662.3 | Mild; compressed ventricles without compressed brain stem cisterns |
| 140664.4 | Moderate; compressed ventricles and brain stem cisterns |
| 140666.5 | Severe; absent ventricles or brain stem cisterns |
| 140676.3 | Infarction (acute due to traumatic vascular occlusion) |
| 140678.4 | Intraventricular hemorrhage |
| 140680.3 | Ischemic brain damage directly related to head trauma |
| 140682.3 | Pneumocephalus directly related to head trauma |
| 140684.3 | Subarachnoid hemorrhage NFS |
| 140686.3 | Subpial hemorrhage NFS |
| 140799.3 | Pituitary injury |
| Skeletal | |
| 150200.3 | Basilar skull fracture NFS |
| 150202.3 | Without CSF leak |
| 150204.3 | With CSF leak |
| 150206.4 | Complex; open with torn, exposed, or loss of brain tissue; comminuted; ring; hinge |
| 150404.3 | Vault fracture  Comminuted; compound but dura intact; depressed ≤ 2 cm; displaced |
| 150406.4 | Complex; open with torn, exposed, or loss of brain tissue |
| 150408.4 | Massive; large areas of skull depressed > 2 cm |
| Concussive injury | |
| 160206.3 | Cerebral concussion, with loss of consciousness 1–6 h (severe concussion) |
| 160210.4 | Diffuse axonal injury (prolonged traumatic coma LOC > 6 h not due to mass lesion) NFS |
| 160814.4 | LOC 6–24 h (mild DAI) |
| 160818.5 | LOC > 24 h NFS  Without brainstem signs (moderate DAI) |
| 160824.5 | With brainstem signs (severe DAI) |

**Abbreviations**: AIS, abbreviated injury scale; CT, computed tomography; TBI, traumatic brain injury; EDH, epidural hematoma; SDH, subdural hematoma; SAH, subarachnoid hemorrhage; IPH, intraparenchymal hemorrhage; DAI, diffuse axonal injury; NFS, not further specified; CSF, cerebrospinal fluid; LOC, loss of consciousness.

2.2. Table S2: AIS codes used for blunt abdominal injury

The classification of blunt abdominal injuries was based on the 1998 AIS coding system. Injuries were categorized into seven main groups: vascular, digestive tract, kidney, liver, pancreatic, splenic injuries, and others. Only injuries with AIS scores ≥ 3 were included.

| AIS 98 code | Specifications |
| --- | --- |
| Whole area | |
| 510606.3 | Skin/Subcutaneous/Muscle (except rectus abdominus) laceration; blood loss > 20% by volume |
| 510806.3 | Skin/Subcutaneous/Muscle (except rectus abdominus) avulsion; blood loss > 20% by volume |
| Vessels | |
| 520299.4 | Aorta abdominal NFS |
| 520202.4 | Intimal tear, no disruption |
| 520204.4 | Laceration; perforation; puncture NFS |
| 520206.4 | Minor; superficial; incomplete circumferential involvement; blood loss ≤ 20% by volume |
| 520208.5 | Major; rupture; transection; segmental loss; blood loss > 20% by volume |
| 520499.3 | Celiac artery NFS |
| 520402.3 | Intimal tear, no disruption |
| 520404.3 | Laceration; perforation; puncture NFS |
| 520406.4 | Minor; superficial; incomplete circumferential involvement; blood loss ≤ 20% by volume |
| 520408.5 | Major; rupture; transection; segmental loss; blood loss > 20% by volume |
| 520699.3 | Iliac artery (common, internal, external) and its named branches NFS  Bilateral (for common iliac artery only) |
| 520602.3 | Intimal tear, no disruption |
| 520604.3 | Laceration; perforation; puncture NFS |
| 520606.3 | Minor; superficial; incomplete circumferential involvement; blood loss ≤ 20% by volume |
| 520608.4 | Major; rupture; transection; segmental loss; blood loss > 20% by volume |
| 521499.3 | Superior mesenteric artery NFS |
| 521402.3 | Intimal tear, no disruption |
| 521404.3 | Laceration; perforation; puncture NFS |
| 521406.3 | Minor; superficial; incomplete circumferential involvement; blood loss ≤ 20% by volume |
| 521408.4 | Major; rupture; transection; segmental loss; blood loss > 20% by volume |
| 520899.3 | Iliac vein (common) NFS |
| 520802.3 | Laceration; perforation; puncture NFS |
| 520804.3 | Minor; superficial; incomplete circumferential involvement; blood loss ≤ 20% by volume |
| 520806.4 | Major; rupture; transection; segmental loss; blood loss > 20% by volume |
| 521006.3 | Iliac vein (internal, external) NFS  Laceration  Major; rupture; transection; segmental loss; blood loss > 20% by volume |
| 521299.3 | Vena cava, inferior NFS |
| 521202.3 | Laceration; perforation; puncture NFS |
| 521204.3 | Minor; superficial; incomplete circumferential involvement; blood loss ≤ 20% by volume |
| 521206.4 | Major; rupture; transection; segmental loss; blood loss > 20% by volume |
| 521699.3 | Other named veins NFS (such as portal, renal, splenic, superior mesenteric) |
| 521602.3 | Laceration; perforation; puncture NFS |
| 521604.3 | Minor with or without thrombosis; superficial; incomplete circumferential involvement; blood loss ≤ 20% by volume |
| 521606.4 | Major; rupture; transection; segmental loss; blood loss > 20% by volume |
| Internal organs | |
| 540226.3 | Adrenal glands massive; avulsion; complex; rupture; > 50% parenchymal destruction (OIS Ⅳ, Ⅴ) |
| 540424.3 | Anus  Laceration  Perforation; full thickness |
| 540426.4 | Laceration  Massive; avulsion; complex; rupture; major tissue loss |
| 540622.3 | Bladder (urinary)  Lacerations  No perforation; partial thickness (OIS Ⅰ)  Extraperitoneal wall ≤ 2 cm (OIS Ⅱ)  Extraperitoneal wall > 2 cm; intraperitoneal wall < 2 cm (OIS Ⅲ) |
| 540624.4 | Intraperitoneal wall > 2 cm (OIS Ⅳ) |
| 540626.4 | Massive; avulsion; complex, tissue loss; involving urethral orifice (trigone) or bladder neck (OIS Ⅴ) |
| 540640.3 | Rupture NFS |
| 540824.3 | Colon (large bowel)  Perforation; full thickness; ≥ 50% circumference without transection; multiple simple wounds (OIS Ⅲ) |
| 540826.4 | Massive; avulsion; complex; tissue loss; transection; large areas of tissue devitalization or devascularization (OIS Ⅳ, Ⅴ) |
| 541023.3 | Duodenum  Laceration  Disruption 50–100% circumference of D1 (superior or first part), D3 (transverse or third part) or D4 (ascending or fourth part) (OIS Ⅲ)  Disruption 50–75% circumference of D2 (descending or second part) (OIS Ⅲ) |
| 541024.4 | Disruption > 75% circumference of D2 (descending or second part); involving ampulla or distal common bile duct (OIS Ⅳ) |
| 541028.5 | Massive; avulsion; complex; rupture; tissue loss; devascularization; massive disruption of duodenopancreatic complex (OIS Ⅴ) |
| 541224.3 | Gallbladder  Laceration  Massive; avulsion; complex; rupture; tissue loss; cystic duct laceration or transection (OIS Ⅲ) |
| 541226.4 | With common bile or hepatic duct laceration or transection (OIS Ⅳ, Ⅴ) |
| 541424.3 | Jejunum-ileum (small bowel)  Laceration  Perforation; full thickness; ≥ 50% circumference without transection; multiple simple wounds (OIS Ⅲ) |
| 541426.4 | Massive; avulsion; complex; tissue loss; transection; large areas of tissue devitalization or devascularization (OIS Ⅳ, Ⅴ) |
| 541614.3 | Kidney  Contusion  Subcapsular, > 50% surface area or expanding; major; large (OIS Ⅲ) |
| 541624.3 | Laceration  > 1 cm parenchymal depth of renal cortex, no collecting system rupture or urinary extravasation; moderate (OIS Ⅲ) |
| 541626.4 | Extending through the renal cortex, medulla, and collecting system; main renal vessel injury with contained hemorrhage; major (OIS Ⅳ) |
| 541628.5 | Hilum avulsion; total destruction of organ and its vascular system (OIS Ⅴ) |
| 541640.4 | Rupture |
| 541814.3 | Liver  Contusion; hematoma  Subcapsular, > 50% surface area or expanding; ruptured subcapsular or parenchymal; intraparenchymal ≤ 10 cm or expanding; major (OIS Ⅲ) |
| 541824.3 | Laceration  > 3 cm parenchymal; major duct involvement; moderate (OIS Ⅲ) |
| 541826.4 | Parenchymal disruption ≤ 75% hepatic lobe; multiple lacerations > 3 cm deep; “burst” injury; major (OIS Ⅳ) |
| 541828.5 | Parenchymal disruption > 75% hepatic lobe or > 3 Couinard’s segments with a single lobe; or involving retrohepatic vena cava/ central hepatic veins; massive; complex (OIS Ⅴ) |
| 541840.4 | Rupture |
| 542024.3 | Mesentery  Laceration  Major |
| 542026.4 | Massive; avulsion; complex; tissue loss |
| 542224.3 | Omentum  Laceration  Major |
| 542624.3 | Ovary  Laceration  Deep; > 5 cm (OIS Ⅲ)  Complete parenchymal destruction; massive; avulsion; complex (OIS Ⅳ, Ⅴ) |
| 542814.3 | Pancreas  Contusion  Major; large; extensive; with duct involvement (OIS Ⅱ) |
| 542824.3 | Laceration  Moderate; major vessel or major duct involvement; distal transection (OIS Ⅲ) |
| 542826.4 | If involving ampulla (OIS Ⅳ) |
| 542828.4 | Major; multiple lacerations; proximal transection (OIS Ⅳ) |
| 542830.4 | If involving ampulla (OIS Ⅳ) |
| 542832.5 | Massive; avulsion; complex; tissue loss; massive disruption of pancreatic head (OIS Ⅴ) |
| 543026.3 | Penis  Laceration  Massive; amputation; avulsion; complex (OIS Ⅴ) |
| 543226.3 | Perineum  Laceration; perforation  Massive; avulsion; complex (OIS Ⅴ) |
| 543624.3 | Rectum  Laceration  Full thickness; > 50% circumference (OIS Ⅲ) |
| 543625.4 | Extending into the perineum (OIS Ⅳ) |
| 543626.5 | Massive avulsion; tissue loss; devascularization (OIS Ⅴ) |
| 543800.3 | Retroperitoneum hemorrhage or hematoma |
| 544214.3 | Spleen  Contusion  Subcapsular, > 50% surface area or expanding; ruptured subcapsular or parenchymal; intraparenchymal > 5 cm in diameter or expanding; major (OIS Ⅲ) |
| 544224.3 | No hilar or segmental parenchymal disruption or destruction; > 3 cm parenchymal depth or involving trabecular vessels; moderate (OIS Ⅲ) |
| 544226.4 | Involving segmental or hilar vessels producing major devascularization for > 25% of the spleen but no hilar injury; major (OIS Ⅳ) |
| 544228.5 | Hilar disruption producing total devascularization: tissue loss; avulsion; stellate; massive (OIS Ⅴ) |
| 544240.3 | Rupture NFS |
| 544424.3 | Stomach  Laceration  Perforation; full thickness (OIS Ⅱ, Ⅲ) |
| 544426.4 | Avulsion; complex; rupture; tissue loss; massive; devascularization (OIS Ⅳ, Ⅴ) |
| 544824.3 | Ureter  Laceration  Perforation; full thickness (OIS Ⅲ) |
| 544826.3 | Massive; avulsion; complex; rupture; tissue loss; transection (OIS Ⅳ, Ⅴ) |
| 545024.3 | Urethra  Laceration  Perforation; full thickness; urethral separation < 2 cm (OIS Ⅳ) |
| 545026.3 | Avulsion; complex; tissue loss massive (OIS Ⅳ) |
| 545028.4 | Posterior tissue loss; transection; urethral separation > 2 cm (OIS Ⅴ) |
| 545230.3 | Uterus  Laceration  Involving uterine artery; placental abruption > 50% but not complete (OIS Ⅳ) |
| 545240.3 | Uterine rupture; avulsion; devascularization; complete placental abruption |
| 545426.3 | Vagina  Laceration  Massive; avulsion; complex; into cervix or peritoneum (OIS Ⅳ, Ⅴ) |
| 545626.3 | Vulva  Laceration  Massive; avulsion; complex (OIS Ⅳ, Ⅴ) |

**Abbreviations**: AIS: abbreviated injury scale; NFS: not further specified; OIS: organ injury scale

2.3. Table S3: Details regarding complications as secondary outcomes

Complications were classified based on organ systems and clinical manifestations as recorded in the Japan Trauma Data Bank. The classification system was designed to capture all major complications that could impact patient outcomes during hospitalization. Complications were systematically recorded using standardized definitions across participating institutions.

| Classification | Variables recorded in the Japan Trauma Databank |
| --- | --- |
| Central nervous system complications | Urocephalus, hydrocephalus, fat embolism, cerebrospinal fluid fistula, meningitis, higher brain dysfunction, psychiatric disorders |
| Abdominal complications | Stress ulcers, gastrointestinal hemorrhage, ileus, pancreatitis, cholecystitis, hyperbilirubinemia, liver failure, abdominal compartment syndrome |
| Coagulopathy complications | DIC, blood coagulation disorders, thrombocytopenia (< 50,000) |
| Circulatory complications | Myocardial infarction, severe arrhythmia, prolonged shock, acute renal failure |
| Respiratory complications | Pulmonary edema, pulmonary embolism, ARDS |
| Infectious complications | Pneumonia, pyothorax, bacteremia, sepsis/multi-organ failure, intra-abdominal abscess, urinary tract infection, wound infection |

**Abbreviations:** DIC, disseminated intravascular coagulation; ARDS, acute respiratory distress syndrome
